# Supplementary material
Source: PubMed Central journal article supplement (PMC2614061)
Supplement: 2008.158709_1.pdf [file 2008.158709_1.pdf]

Supplementary figure and legend

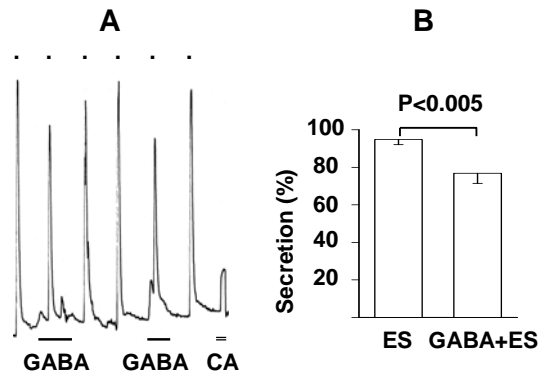

The total amount of catecholamine secretion in response to electrical stimulation and 20  $\mu$ M GABA reversibly diminished during the application of GABA, even though the application of GABA itself resulted in catecholamine secretion.

A, recording trace of continuous measurement of catecholamine secretion from a perfused rat adrenal gland. The amperometric measurement of catecholamine secretion was performed, as described elsewhere (Fujiwara et al., 1994). After a catheter was inserted into the adrenal vein and splanchnic nerve was cut just below the diaphragm, the adrenal gland was removed from the rat. The electrical stimulation (ES) of splanchnic nerve with a pair of hook electrodes was done with 1 V pulses of 1.5 ms duration at 10 Hz for 30 s every 10 min at the indicated times (dots). CA represents calibration of 150 pmol min<sup>-1</sup>. B, summary of amount of catecholamine secretion in response to electrical stimulation with (GABA + ES) and without application of 20  $\mu$ M

GABA (ES). The amount of catecholamine secretion (GABA + ES and ES) was expressed as a fraction of that of catecholamine secretion electrically evoked just before perfusion of a saline with or without GABA, respectively. Data represent means  $\pm$  SEM (ES, n = 11; GABA + ES, n = 6).

Fujiwara N, Warashina A & Shimoji K (1994). Characterization of low pH-induced catecholamine secretion in the rat adrenal medulla. *J Neurochem* **62**, 1809-1815.
